# Supplementary material for: Complimentary effects of annealing temperature on optimal tuning of functionalized carbon–V2O5 hybrid nanobelts for targeted dual applications in electrochromic and supercapacitor devices
Source: Royal Society of Chemistry journal article supplement (doi:10.1039/c7ra13357j), 2018-01-01
Supplement: c7ra13357j1.pdf [file c7ra13357j1.pdf]

## Complimentary effects of annealing temperature towards optimal tuning of functionalized Carbon-V<sub>2</sub>O<sub>5</sub> hybrid nanobelts for targeted dual applications in electrochromic and supercapacitor devices

Remya Narayanan<sup>a\*</sup>, Anweshi Dewan<sup>b</sup>, Debanjan Chakraborty

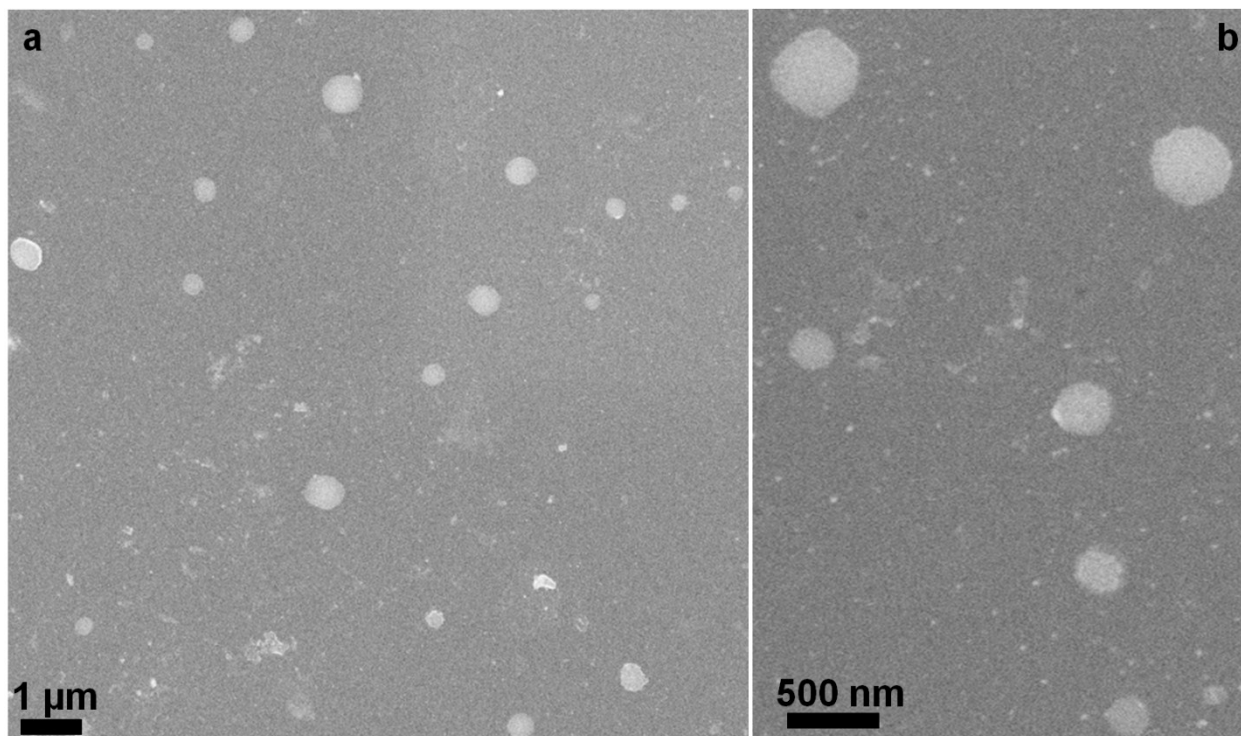

Figure S1: SEM images of C-dots.

Formation carbon nano-sphere under hydrothermal condition at a temperature of 140 °C for 5 h.

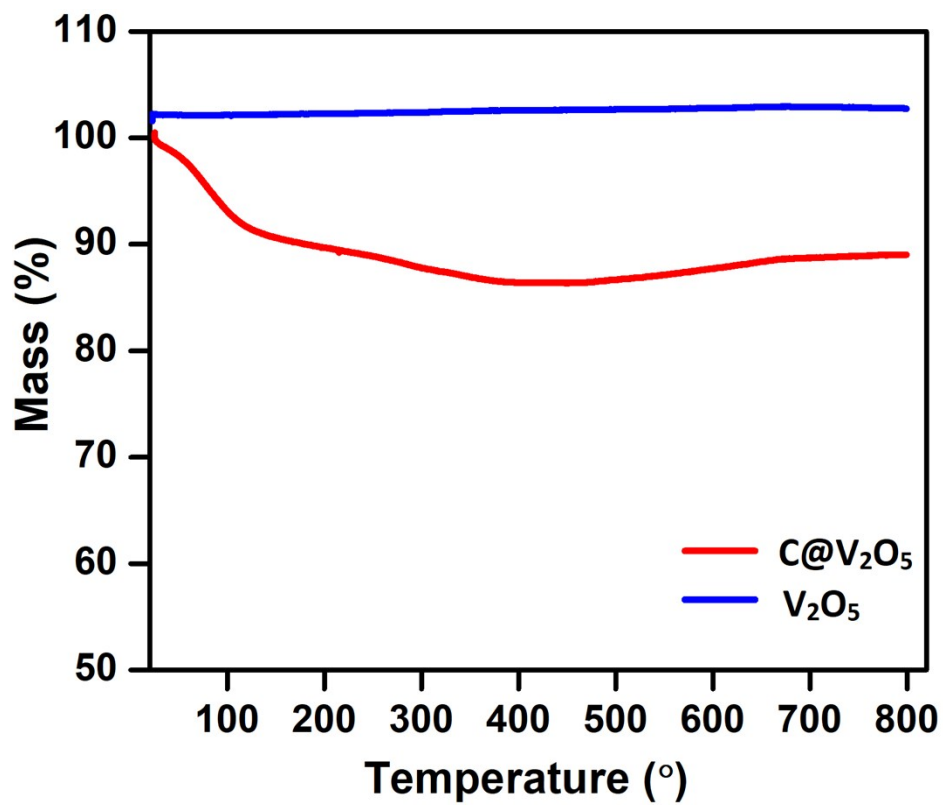

Figure S2: TGA curves of C@V<sub>2</sub>O<sub>5</sub> and V<sub>2</sub>O<sub>5</sub>

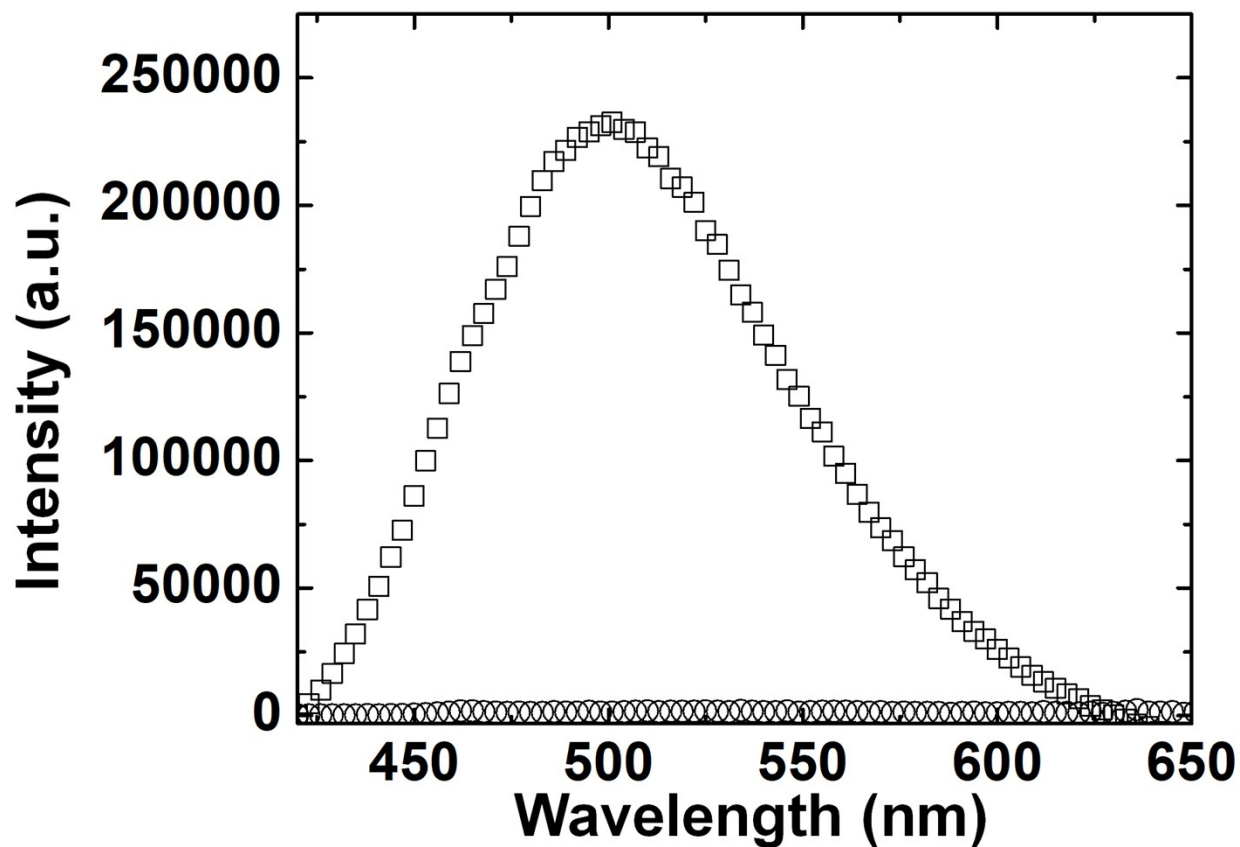

Figure S3: photoluminescence spectra of  $V_2O_5$  nanorods (o) and  $C@V_2O_5$  (□) at an excitation wavelength of 370 nm.

$C@V_2O_5$  shows a broad luminescent peak in the range of 420-600 nm whereas the one without C-dot doesn't show any characteristic emission peak, which apparently indicates that the luminescent characteristics arise from the presence of carbon nano-sphere.

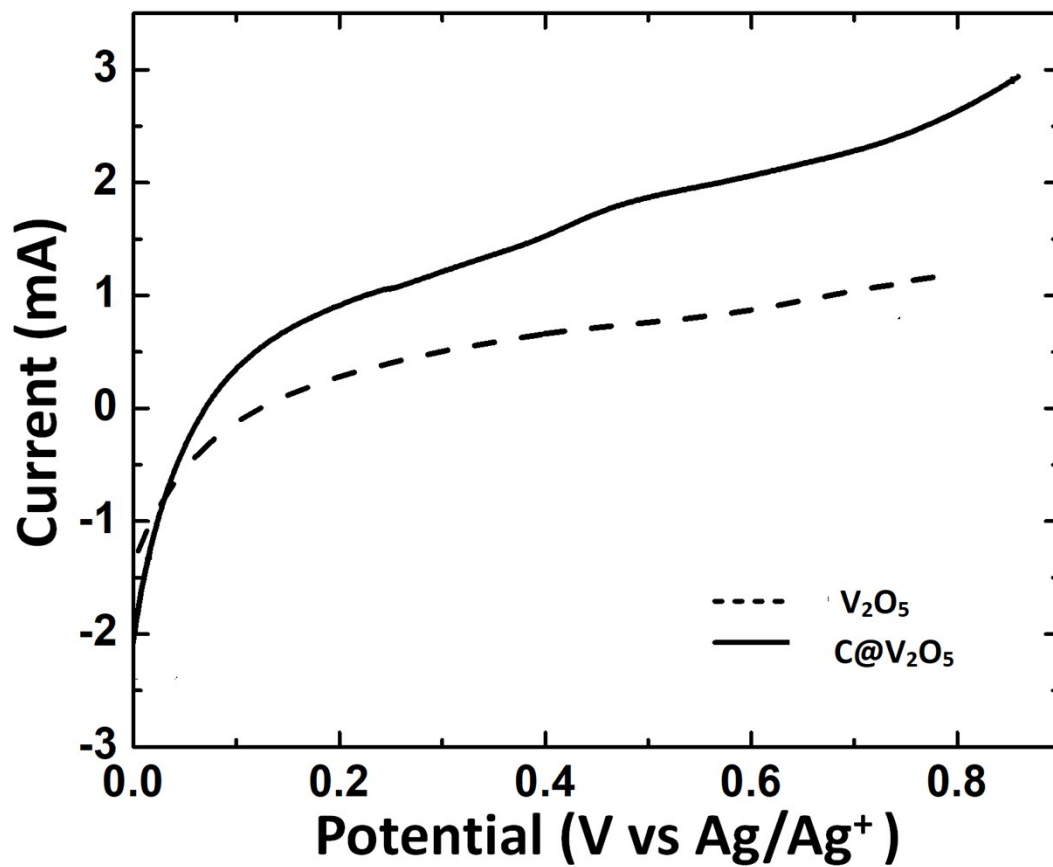

Figure S4: Linear sweep voltammetry of V<sub>2</sub>O<sub>5</sub> and C@V<sub>2</sub>O<sub>5</sub> by employing Pt wire as the counter electrode.

LSV clearly shows the higher value of current density values of C@V<sub>2</sub>O<sub>5</sub> compared to pristine V<sub>2</sub>O<sub>5</sub>
